# Supplementary material for: Novel red-emitting phosphors A2HfF6:Mn4+(A = Rb+, Cs+) for solid-state lighting
Source: Royal Society of Chemistry journal article supplement (doi:10.1039/c7dt01842h), 2017-01-01
Supplement: c7dt01842h1.pdf [file c7dt01842h1.pdf]

**Novel red-emitting phosphors  $A_2HfF_6:Mn^{4+}$  ( $A = Rb^+, Cs^+$ )  
for solid-state lighting**

Zhaofeng Yang,<sup>a</sup> Qianwen Wei,<sup>a</sup> Meizhu Rong,<sup>b</sup> Zhiyu Yang,<sup>a</sup> Zhengliang Wang,<sup>a\*</sup>

Qiang Zhou,<sup>a</sup> and Qin Wang<sup>b\*</sup>

*<sup>a</sup> Key Laboratory of Comprehensive Utilization of Mineral Resource in Ethnic  
Regions, Joint Research Centre for International Cross-border Ethnic Regions  
Biomass Clean Utilization in Yunnan, School of Chemistry & Environment, Yunnan  
Minzu University, Kunming, Yunnan 650500, P. R. China.*

*<sup>b</sup>College of Chemistry and Chemical Engineering, Yunnan Normal University,  
Kunming, Yunnan 650500, P. R. China.*

\* Corresponding author

E-mail: wangzhengliang@foxmail.com (Zhengliang Wang);

wangqinyinu@163.com(Qin Wang)

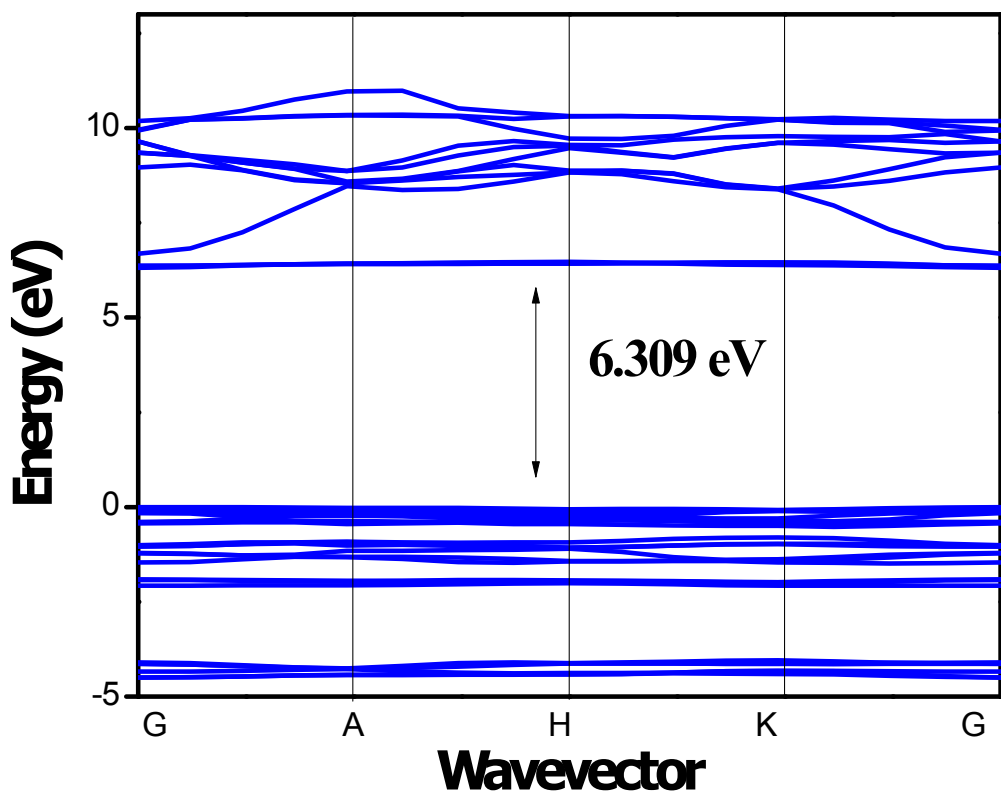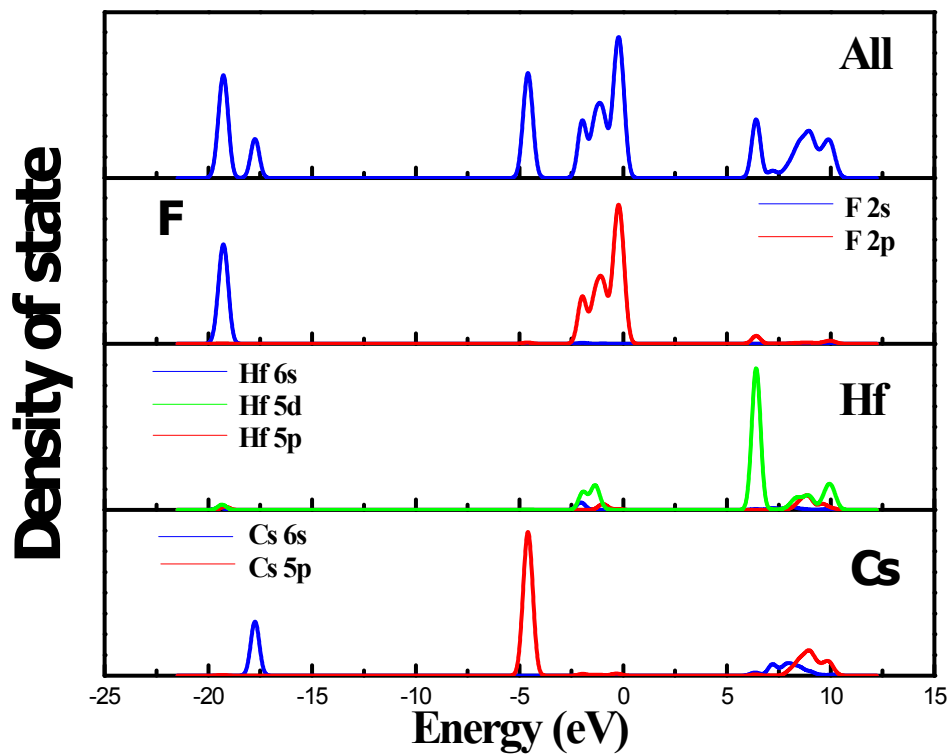

**Fig. S1** (a) calculated energy band structure of  $\text{Cs}_2\text{HfF}_6$ , (b) total and partial density of states for  $\text{Cs}_2\text{HfF}_6$ .

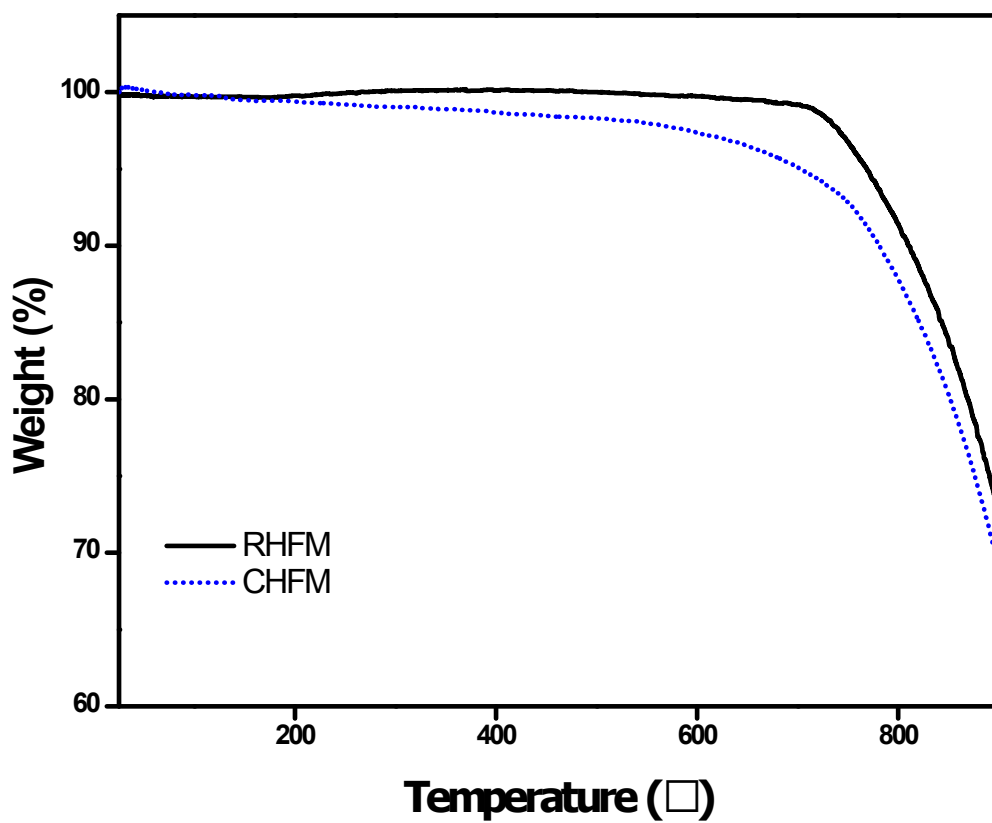

Fig.S2 TG curves of  $A_2HfF_6:Mn^{4+}$  ( $A = Rb^+, Cs^+$ ).

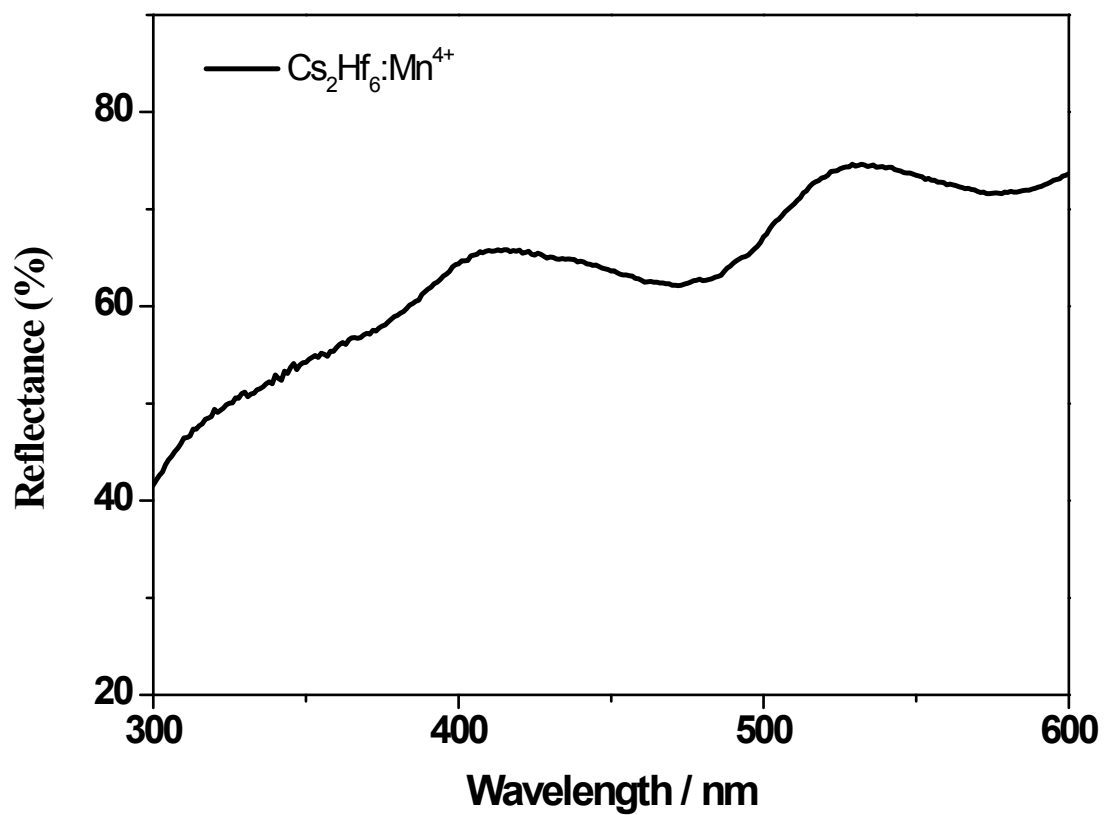

**Fig. S3** Diffuse reflectance spectrum of  $\text{Cs}_2\text{Hf}_6:\text{Mn}^{4+}$ .

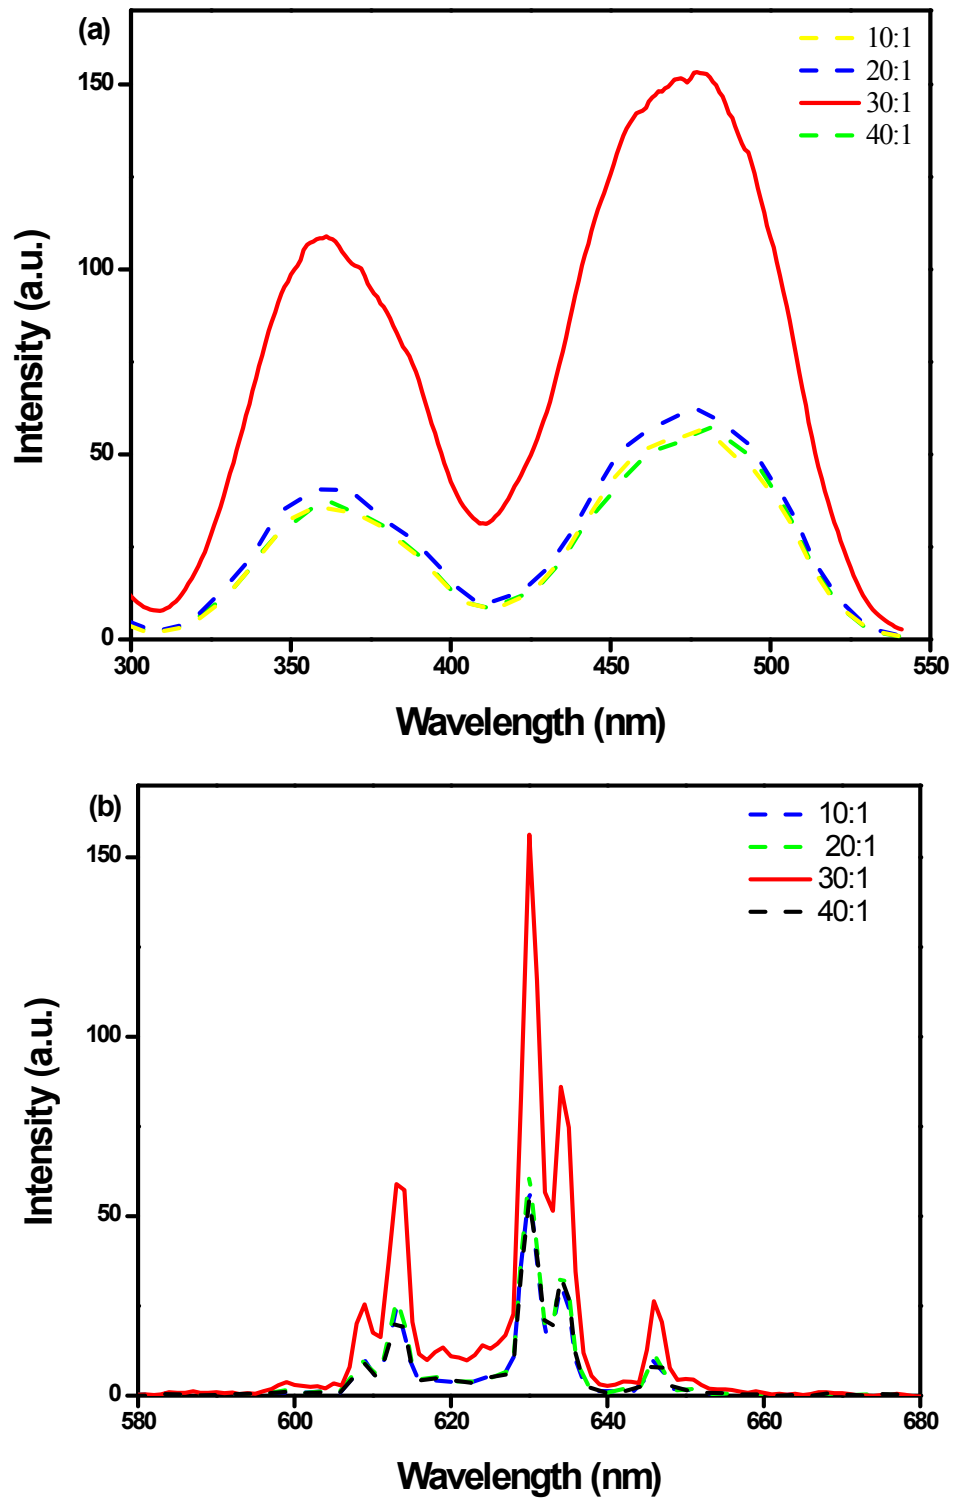

**Fig.S4** (a) Excitation and (b) emission spectra of the  $\text{Rb}_2\text{HfF}_6:\text{Mn}^{4+}$  samples with different molar ratios of  $\text{HfO}_2$  to  $\text{K}_2\text{MnF}_6$  (40:1, 30:1, 20:1 and 10:1). ( $\lambda_{\text{em}} = 630 \text{ nm}$ ,  $\lambda_{\text{ex}} = 476 \text{ nm}$ )

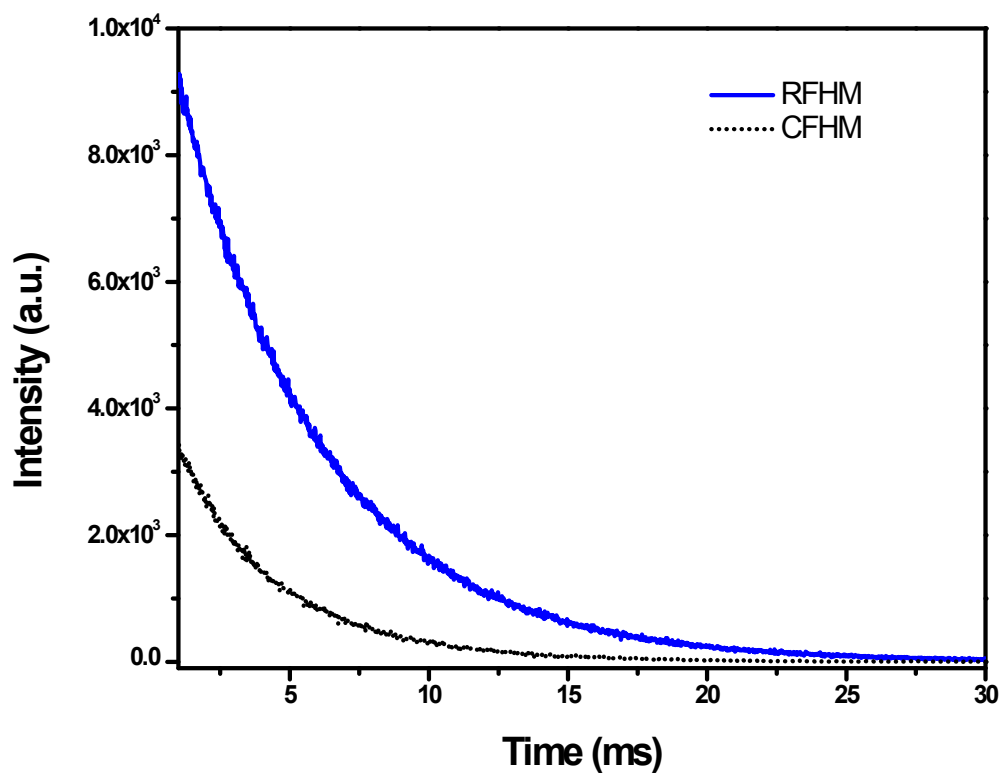

Fig.S5 Decay curves of RHF and CF ( $\lambda_{em} = 630 \text{ nm}$ ,  $\lambda_{ex} = 476 \text{ nm}$ )

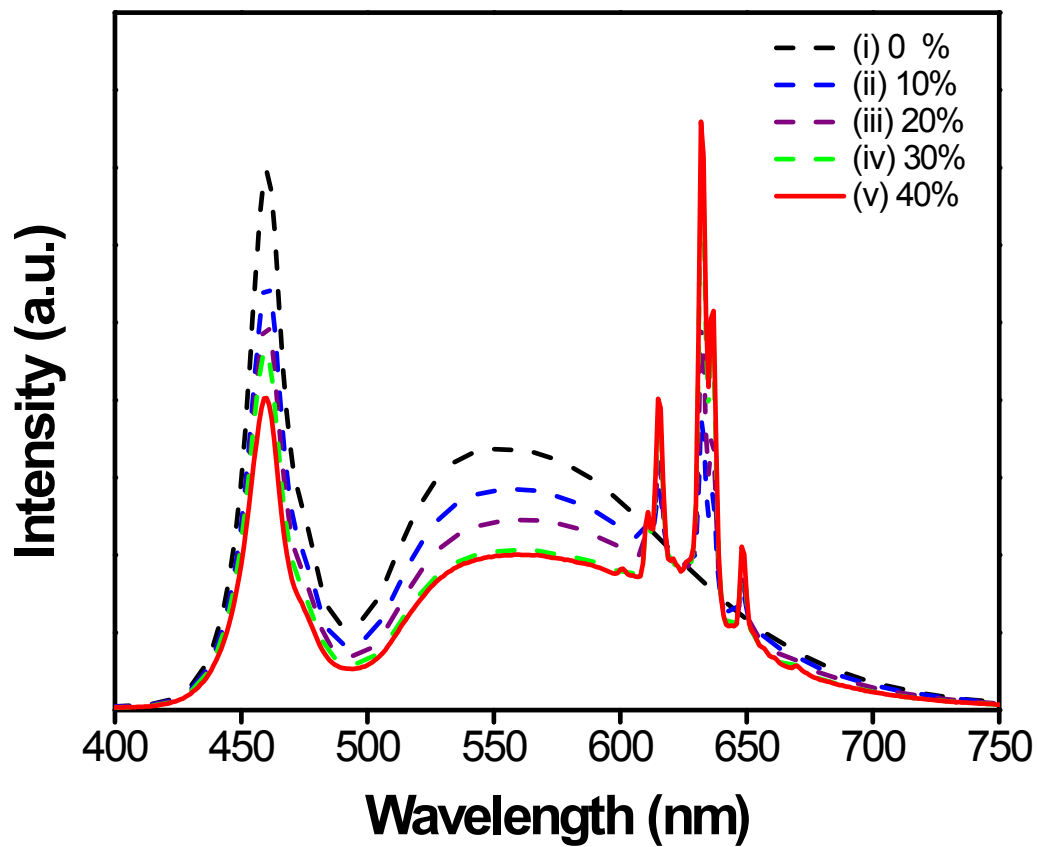

Fig.S6 EL spectra of w-LEDs based on RHFM under 20 mA drive current.
